# Supplementary material for: Estimating the optimal threshold for a diagnostic biomarker in case of complex biomarker distributions
Source: Springer Nature journal article supplement (doi:10.1186/1472-6947-14-53), 2014-06-14
Supplement: 12911_2013_815_MOESM2_ESM.pdf [file 12911_2013_815_MOESM2_ESM.pdf]

# Estimating the optimal threshold for a diagnostic biomarker in case of complex biomarker distributions

Fabien Subtil – Muriel Rabilloud

## Additional file 2

### Part 1 - Complementary simulations or results relative to section “Heterogeneity in the variance of biomarker measurements”

**Relative bias of the optimal threshold assuming a Gaussian or a Student- $t$  distribution with the coverage probability and the mean width of the 95% credible interval (unequal number of subjects in diseased and non-diseased groups, Design 1)**

|       |       |            |            | Relative bias <sup>*</sup> |          |          |          |          |          | Coverage probability <sup>†</sup> |       |       |       | CI mean width <sup>†</sup> |       |       |       |
|-------|-------|------------|------------|----------------------------|----------|----------|----------|----------|----------|-----------------------------------|-------|-------|-------|----------------------------|-------|-------|-------|
|       |       |            |            | Mode                       |          | Median   |          | Mean     |          | Quantile                          |       | HPD   |       | Quantile                   |       | HPD   |       |
| $N_0$ | $N_1$ | $\sigma_0$ | $\sigma_1$ | Gauss                      | $t$      | Gauss    | $t$      | Gauss    | $t$      | Gauss                             | $t$   | Gauss | $t$   | Gauss                      | $t$   | Gauss | $t$   |
| 100   | 50    | 0.07       | 0.07       | -0.00115                   | -0.00343 | -0.00115 | -0.00378 | -0.00115 | -0.00363 | 0.948                             | 0.948 | 0.947 | 0.948 | 0.017                      | 0.019 | 0.017 | 0.019 |
| 100   | 50    | 0.05       | 0.05       | -0.00091                   | -0.00333 | -0.00094 | -0.00366 | -0.00092 | -0.00352 | 0.947                             | 0.948 | 0.942 | 0.945 | 0.017                      | 0.019 | 0.017 | 0.018 |
| 100   | 50    | 0.03       | 0.03       | -0.00046                   | -0.00196 | -0.00031 | -0.00194 | -0.00035 | -0.00196 | 0.947                             | 0.949 | 0.942 | 0.946 | 0.013                      | 0.014 | 0.013 | 0.014 |
| 100   | 75    | 0.07       | 0.07       | -0.00058                   | -0.00120 | -0.00071 | -0.00134 | -0.00068 | -0.00131 | 0.953                             | 0.954 | 0.952 | 0.953 | 0.024                      | 0.023 | 0.024 | 0.023 |
| 100   | 75    | 0.05       | 0.05       | -0.00059                   | -0.00132 | -0.00050 | -0.00145 | -0.00051 | -0.00140 | 0.949                             | 0.954 | 0.945 | 0.952 | 0.015                      | 0.016 | 0.015 | 0.016 |
| 100   | 75    | 0.03       | 0.03       | -0.00010                   | -0.00070 | -0.00007 | -0.00068 | -0.00008 | -0.00068 | 0.954                             | 0.960 | 0.950 | 0.955 | 0.011                      | 0.012 | 0.011 | 0.012 |

True marker distribution in the  $N_0$  non-diseased subjects: Gaussian distribution (mean = -0.3, standard deviation =  $\sigma_0$ )

True marker distribution in the  $N_1$  diseased subjects: Gaussian distribution (mean = -0.25, standard deviation =  $\sigma_1$ )

<sup>\*</sup> Relative bias of the mode, the median, and the mean estimates of the optimal threshold.

<sup>†</sup> Coverage probability and credible interval (CI) mean width found with the quantile and the Highest Posterior Density (HPD) region method.

Gauss: Gaussian distribution –  $t$ : Student- $t$  distribution.

**Relative bias of the optimal threshold using the empirical, boxcox, and kernel methods, with the coverage probability and the mean width of the 95% credible interval (Design 1)**

| $N_0$ | $N_1$ | $\sigma_0$ | $\sigma_1$ | Relative bias * |         |         | Coverage probability † |        |          | CI mean width † |        |          |
|-------|-------|------------|------------|-----------------|---------|---------|------------------------|--------|----------|-----------------|--------|----------|
|       |       |            |            | Empirical       | Boxcox  | Kernel  | Empirical              | Boxcox | Kernel ‡ | Empirical       | Boxcox | Kernel ‡ |
| 100   | 50    | 0.07       | 0.07       | -0.0024         | -0.0005 | 0.0003  | 0.964                  | 0.947  | -        | 0.059           | 0.023  | -        |
| 100   | 50    | 0.05       | 0.05       | -0.0023         | -0.0002 | -0.0000 | 0.958                  | 0.947  | -        | 0.038           | 0.016  | -        |
| 100   | 50    | 0.03       | 0.03       | -0.0039         | -0.0006 | -0.0003 | 0.909                  | 0.946  | -        | 0.022           | 0.010  | -        |
| 100   | 75    | 0.07       | 0.07       | -0.0034         | -0.0013 | 0.0003  | 0.959                  | 0.954  | -        | 0.073           | 0.032  | -        |
| 100   | 75    | 0.05       | 0.05       | -0.0034         | 0.0002  | 0.0004  | 0.944                  | 0.941  | -        | 0.046           | 0.022  | -        |
| 100   | 75    | 0.03       | 0.03       | -0.0076         | -0.0002 | -0.0001 | 0.829                  | 0.936  | -        | 0.026           | 0.015  | -        |

True marker distribution in the  $N_0$  non-diseased subjects: Gaussian distribution (mean = -0.3, standard deviation =  $\sigma_0$ )

True marker distribution in the  $N_1$  diseased subjects: Gaussian distribution (mean = -0.25, standard deviation =  $\sigma_1$ )

\* Relative bias of the mode, the median, and the mean estimates of the optimal threshold.

† Coverage probability and credible interval (CI) mean width found with the quantile and the Highest Posterior Density (HPD) region method.

**Relative bias of the optimal threshold using the empirical, boxcox, and kernel methods, with the coverage probability and the mean width of the 95% credible interval (Design 2)**

| $\nu$ | Relative bias <sup>*</sup> |                |        | Coverage probability <sup>†</sup> |                |                     | CI mean width <sup>†</sup> |                |                     |
|-------|----------------------------|----------------|--------|-----------------------------------|----------------|---------------------|----------------------------|----------------|---------------------|
|       | Empirical                  | Boxcox         | Kernel | Empirical                         | Boxcox         | Kernel <sup>‡</sup> | Empirical                  | Boxcox         | Kernel <sup>‡</sup> |
| 1     | 0.0035                     | - <sup>§</sup> | 0.0302 | 0.965                             | - <sup>§</sup> | -                   | 0.052                      | - <sup>§</sup> | -                   |
| 4     | -0.0009                    | 0.0281         | 0.0055 | 0.972                             | 0.888          | -                   | 0.050                      | 0.029          | -                   |
| 8     | -0.0016                    | 0.0073         | 0.0022 | 0.970                             | 0.935          | -                   | 0.050                      | 0.023          | -                   |
| 12    | -0.0025                    | 0.0034         | 0.0009 | 0.971                             | 0.947          | -                   | 0.050                      | 0.022          | -                   |

True marker distribution in the non-diseased group: Gaussian distribution (mean = -0.3, standard deviation = 0.05)

True marker distribution in the diseased group: Student-*t* distribution (mean = -0.25, standard deviation = 0.05,  $\nu$  degrees of freedom)

<sup>\*</sup> Relative bias of the optimal threshold estimate.

<sup>†</sup> Coverage probability and credible interval (CI) mean width.

<sup>‡</sup> Not estimated since time consuming.

<sup>§</sup> Not assessed due to the difficulty to estimate the boxcox transformation parameter for this example.

**Relative bias of the optimal threshold using the empirical, boxcox, and kernel methods, with the coverage probability and the mean width of the 95% credible interval (Design 3)**

| $\sigma_2$ | $\rho$ | Relative bias * |         |        | Coverage probability † |        |          | CI mean width † |        |          |
|------------|--------|-----------------|---------|--------|------------------------|--------|----------|-----------------|--------|----------|
|            |        | Empirical       | Boxcox  | Kernel | Empirical              | Boxcox | Kernel ‡ | Empirical       | Boxcox | Kernel ‡ |
| 0.10       | 0.3    | -0.0029         | 0.0165  | 0.0059 | 0.971                  | 0.930  | -        | 0.054           | 0.028  | -        |
| 0.10       | 0.2    | -0.0037         | 0.0106  | 0.0026 | 0.970                  | 0.940  | -        | 0.053           | 0.026  | -        |
| 0.10       | 0.1    | -0.0016         | 0.0048  | 0.0014 | 0.971                  | 0.942  | -        | 0.052           | 0.023  | -        |
| 0.075      | 0.3    | -0.0030         | -0.0006 | 0.0025 | 0.970                  | 0.946  | 0.850    | 0.054           | 0.024  | 0.031    |
| 0.075      | 0.2    | -0.0020         | -0.0004 | 0.0019 | 0.970                  | 0.946  | 0.849    | 0.052           | 0.022  | 0.029    |
| 0.075      | 0.1    | -0.0005         | -0.0003 | 0.0018 | 0.967                  | 0.947  | 0.842    | 0.051           | 0.021  | 0.028    |

True marker distribution in the non-diseased group: Gaussian distribution (mean = -0.3, standard deviation = 0.05)

True marker distribution in the diseased group: mixture of two Gaussian distributions  $(p \times N(-0.25, \sigma_2^2) + (1-p) \times N(-0.25, 0.05^2))$

\* Relative bias of the optimal threshold estimate.

† Coverage probability and credible interval (CI) mean width.

‡ Not estimated since time consuming.

Part 2 - Complementary simulations or results relative to section “Heterogeneity in the mean and the variance of biomarker measurements”

**Relative bias of the optimal threshold using the empirical, boxcox, and kernel methods, with the coverage probability and the mean width of the 95% credible interval (Design 4)**

| $N$ | $\sigma_1$ | $\sigma_2$ | Relative bias * |         |        | Coverage probability † |        |          | CI mean width † |        |          |
|-----|------------|------------|-----------------|---------|--------|------------------------|--------|----------|-----------------|--------|----------|
|     |            |            | Empirical       | Boxcox  | Kernel | Empirical              | Boxcox | Kernel ‡ | Empirical       | Boxcox | Kernel ‡ |
| 200 | 0.07       | 0.07       | -0.0071         | -0.0728 | 0.0662 | 0.971                  | 0.290  | -        | 0.092           | 0.025  | -        |
| 200 | 0.08       | 0.05       | 0.0394          | 0.0467  | 0.1493 | 0.983                  | 0.630  | -        | 0.111           | 0.025  | -        |
| 200 | 0.10       | 0.05       | 0.0289          | 0.0432  | 0.1397 | 0.984                  | 0.685  | -        | 0.103           | 0.025  | -        |
| 100 | 0.07       | 0.07       | -0.0133         | -0.0741 | 0.0768 | 0.963                  | 0.597  | -        | 0.106           | 0.035  | -        |
| 100 | 0.08       | 0.05       | 0.0398          | 0.0465  | 0.1658 | 0.982                  | 0.857  | -        | 0.122           | 0.035  | -        |
| 100 | 0.10       | 0.05       | 0.0294          | 0.0413  | 0.1554 | 0.985                  | 0.886  | -        | 0.115           | 0.035  | -        |
| 50  | 0.07       | 0.07       | -0.0312         | -0.0750 | 0.0879 | 0.937                  | 0.777  | -        | 0.116           | 0.049  | -        |
| 50  | 0.08       | 0.05       | 0.0343          | 0.0451  | 0.1803 | 0.980                  | 0.945  | -        | 0.128           | 0.049  | -        |
| 50  | 0.10       | 0.05       | 0.0268          | 0.0400  | 0.1723 | 0.980                  | 0.960  | -        | 0.123           | 0.049  | -        |
| 30  | 0.07       | 0.07       | -0.0490         | -0.0743 | 0.0968 | 0.909                  | 0.864  | -        | 0.122           | 0.064  | -        |
| 30  | 0.08       | 0.05       | 0.0224          | 0.0424  | 0.1905 | 0.972                  | 0.970  | -        | 0.127           | 0.063  | -        |
| 30  | 0.10       | 0.05       | 0.0194          | 0.0384  | 0.1807 | 0.969                  | 0.974  | -        | 0.126           | 0.063  | -        |

True marker distribution in the non-diseased group: Gaussian distribution (mean = -0.3, standard deviation = 0.07)

True marker distribution in the diseased group: mixture of two Gaussian distributions  $(0.5 \times N(0.05, \sigma_1^2) + 0.5 \times N(-0.25, \sigma_2^2))$

\* Relative bias of the optimal threshold estimate. † Coverage probability and credible interval (CI) mean width. ‡ Not estimated since time consuming.

$N$ : number of subjects in each group.
