# Supplementary material for: Estimating the optimal threshold for a diagnostic biomarker in case of complex biomarker distributions
Source: Springer Nature journal article supplement (doi:10.1186/1472-6947-14-53), 2014-06-14
Supplement: 12911_2013_815_MOESM4_ESM.pdf [file 12911_2013_815_MOESM4_ESM.pdf]

# **Estimating the optimal threshold for a diagnostic biomarker in case of complex biomarker distributions**

Fabien Subtil – Muriel Rabilloud

**Additional file 4**

**Left and right coverage probabilities of the credible interval assuming a Gaussian or a Student- $t$  distribution, with the associated theoretical threshold as well as Youden index (Design 1)**

| $N_0$ | $N_1$ | $\sigma_0$ | $\sigma_1$ | Theoretical optimal threshold | Youden index | Quantile  |           |           |           | HPD       |           |           |           |
|-------|-------|------------|------------|-------------------------------|--------------|-----------|-----------|-----------|-----------|-----------|-----------|-----------|-----------|
|       |       |            |            |                               |              | Gauss     |           | $t$       |           | Gauss     |           | $t$       |           |
|       |       |            |            |                               |              | 1 – LCP * | 1 – RCP * | 1 – LCP * | 1 – RCP * | 1 – LCP * | 1 – RCP * | 1 – LCP * | 1 – RCP * |
| 100   | 100   | 0.07       | 0.07       | -0.250                        | 1.525        | 0.030     | 0.025     | 0.028     | 0.025     | 0.030     | 0.027     | 0.029     | 0.026     |
| 100   | 100   | 0.05       | 0.05       | -0.250                        | 1.683        | 0.027     | 0.026     | 0.026     | 0.023     | 0.028     | 0.028     | 0.030     | 0.026     |
| 100   | 100   | 0.03       | 0.03       | -0.250                        | 1.904        | 0.024     | 0.028     | 0.023     | 0.022     | 0.025     | 0.030     | 0.025     | 0.024     |
| 50    | 50    | 0.07       | 0.07       | -0.250                        | 1.525        | 0.028     | 0.022     | 0.025     | 0.021     | 0.029     | 0.023     | 0.026     | 0.024     |
| 50    | 50    | 0.05       | 0.05       | -0.250                        | 1.683        | 0.024     | 0.026     | 0.024     | 0.025     | 0.024     | 0.027     | 0.026     | 0.026     |
| 50    | 50    | 0.03       | 0.03       | -0.250                        | 1.904        | 0.029     | 0.026     | 0.036     | 0.023     | 0.031     | 0.029     | 0.036     | 0.024     |
| 100   | 100   | 0.07       | 0.03       | -0.250                        | 1.717        | 0.024     | 0.026     | 0.053     | 0.007     | 0.027     | 0.023     | 0.059     | 0.006     |
| 100   | 100   | 0.03       | 0.07       | -0.250                        | 1.717        | 0.026     | 0.028     | 0.007     | 0.055     | 0.024     | 0.030     | 0.008     | 0.058     |
| 50    | 50    | 0.07       | 0.03       | -0.250                        | 1.717        | 0.022     | 0.030     | 0.046     | 0.011     | 0.027     | 0.027     | 0.050     | 0.010     |
| 50    | 50    | 0.03       | 0.07       | -0.250                        | 1.717        | 0.025     | 0.022     | 0.006     | 0.046     | 0.023     | 0.029     | 0.006     | 0.052     |
| 100   | 50    | 0.07       | 0.07       | -0.250                        | 1.525        | 0.023     | 0.029     | 0.017     | 0.035     | 0.025     | 0.028     | 0.017     | 0.035     |
| 100   | 50    | 0.05       | 0.05       | -0.250                        | 1.683        | 0.024     | 0.029     | 0.015     | 0.037     | 0.026     | 0.032     | 0.018     | 0.037     |
| 100   | 50    | 0.03       | 0.03       | -0.250                        | 1.904        | 0.026     | 0.027     | 0.017     | 0.035     | 0.027     | 0.030     | 0.019     | 0.036     |
| 100   | 75    | 0.07       | 0.07       | -0.250                        | 1.525        | 0.023     | 0.024     | 0.019     | 0.026     | 0.023     | 0.025     | 0.019     | 0.028     |
| 100   | 75    | 0.05       | 0.05       | -0.250                        | 1.683        | 0.022     | 0.029     | 0.018     | 0.028     | 0.024     | 0.031     | 0.019     | 0.029     |
| 100   | 75    | 0.03       | 0.03       | -0.250                        | 1.904        | 0.025     | 0.021     | 0.020     | 0.020     | 0.027     | 0.023     | 0.023     | 0.023     |

True marker distribution in the  $N_0$  non-diseased subjects: Gaussian distribution (mean = -0.3, standard deviation =  $\sigma_0$ )

True marker distribution in the  $N_1$  diseased subjects: Gaussian distribution (mean = -0.25, standard deviation =  $\sigma_1$ )

\* LCP: Left Coverage Probability – RCP: Right Coverage Probability

Gauss: Gaussian distribution –  $t$ : Student- $t$  distribution.

**Left and right coverage probabilities of the credible interval assuming a Gaussian or a Student- $t$  distribution, with the associated theoretical threshold as well as Youden index (Design 2)**

| $\nu$ | Theoretical optimal threshold | Youden index | Quantile  |           |           |           | HPD       |           |           |           |
|-------|-------------------------------|--------------|-----------|-----------|-----------|-----------|-----------|-----------|-----------|-----------|
|       |                               |              | Gauss     |           | $t$       |           | Gauss     |           | $t$       |           |
|       |                               |              | 1 – LCP * | 1 – RCP * | 1 – LCP * | 1 – RCP * | 1 – LCP * | 1 – RCP * | 1 – LCP * | 1 – RCP * |
| 1     | -0.262                        | 1.351        | 1.000     | 0.000     | 0.051     | 0.017     | 1.000     | 0.000     | 0.044     | 0.019     |
| 4     | -0.271                        | 1.371        | 0.468     | 0.001     | 0.031     | 0.015     | 0.468     | 0.001     | 0.030     | 0.017     |
| 8     | -0.273                        | 1.377        | 0.123     | 0.008     | 0.025     | 0.023     | 0.127     | 0.009     | 0.025     | 0.024     |
| 12    | -0.274                        | 1.379        | 0.068     | 0.012     | 0.024     | 0.021     | 0.070     | 0.012     | 0.027     | 0.021     |

True marker distribution in the non-diseased group: Gaussian distribution (mean = -0.3, standard deviation = 0.05)

True marker distribution in the diseased group: Student- $t$  distribution (mean = -0.25, standard deviation = 0.05,  $\nu$  degrees of freedom)

\* LCP: Left Coverage Probability – RCP: Right Coverage Probability

Gauss: Gaussian distribution –  $t$ : Student- $t$  distribution.

**Left and right coverage probabilities of the credible interval assuming a Gaussian or a Student-*t* distribution, with the associated theoretical threshold as well as Youden index (Design 3)**

| $\sigma_2$ | $p$ | Theoretical optimal threshold | Youden index | Quantile  |           |           |           | HPD       |           |           |           |
|------------|-----|-------------------------------|--------------|-----------|-----------|-----------|-----------|-----------|-----------|-----------|-----------|
|            |     |                               |              | Gauss     |           | <i>t</i>  |           | Gauss     |           | <i>t</i>  |           |
|            |     |                               |              | 1 – LCP * | 1 – RCP * | 1 – LCP * | 1 – RCP * | 1 – LCP * | 1 – RCP * | 1 – LCP * | 1 – RCP * |
| 0.10       | 0.3 | -0.267                        | 1.359        | 0.263     | 0.001     | 0.022     | 0.022     | 0.264     | 0.002     | 0.023     | 0.027     |
| 0.10       | 0.2 | -0.270                        | 1.366        | 0.193     | 0.003     | 0.021     | 0.023     | 0.192     | 0.004     | 0.021     | 0.025     |
| 0.10       | 0.1 | -0.273                        | 1.374        | 0.102     | 0.009     | 0.021     | 0.020     | 0.104     | 0.010     | 0.022     | 0.023     |
| 0.075      | 0.3 | -0.270                        | 1.366        | 0.064     | 0.013     | 0.018     | 0.029     | 0.064     | 0.013     | 0.019     | 0.028     |
| 0.075      | 0.2 | -0.272                        | 1.371        | 0.050     | 0.015     | 0.020     | 0.028     | 0.050     | 0.015     | 0.019     | 0.029     |
| 0.075      | 0.1 | -0.274                        | 1.377        | 0.036     | 0.017     | 0.019     | 0.027     | 0.039     | 0.019     | 0.020     | 0.026     |

True marker distribution in the non-diseased group: Gaussian distribution (mean = -0.3, standard deviation = 0.05)

True marker distribution in the diseased group: mixture of two Gaussian distributions  $(p \times N(-0.25, \sigma_2^2) + (1-p) \times N(-0.25, 0.05^2))$

\* LCP: Left Coverage Probability – RCP: Right Coverage Probability

Gauss: Gaussian distribution – *t*: Student-*t* distribution.

**Left and right coverage probabilities of the credible interval assuming a Gaussian distribution or a Dirichlet process mixture, with the associated theoretical threshold as well as Youden index (Design 4)**

| N   | $\sigma_1$ | $\sigma_2$ | Theoretical optimal threshold | Youden index | Quantile  |           |           |           | HPD       |           |           |           |
|-----|------------|------------|-------------------------------|--------------|-----------|-----------|-----------|-----------|-----------|-----------|-----------|-----------|
|     |            |            |                               |              | Gauss     |           | Dirichlet |           | Gauss     |           | Dirichlet |           |
|     |            |            |                               |              | 1 – LCP * | 1 – RCP * | 1 – LCP * | 1 – RCP * | 1 – LCP * | 1 – RCP * | 1 – LCP * | 1 – RCP * |
| 200 | 0.07       | 0.07       | -0.207                        | 1.543        | 0.377     | 0.000     | 0.010     | 0.043     | 0.369     | 0.000     | 0.012     | 0.062     |
| 200 | 0.08       | 0.05       | -0.239                        | 1.515        | 1.000     | 0.000     | 0.012     | 0.032     | 1.000     | 0.000     | 0.012     | 0.046     |
| 200 | 0.10       | 0.05       | -0.240                        | 1.514        | 1.000     | 0.000     | 0.012     | 0.029     | 1.000     | 0.000     | 0.012     | 0.043     |
| 100 | 0.07       | 0.07       | -0.207                        | 1.543        | 0.207     | 0.001     | 0.007     | 0.049     | 0.201     | 0.001     | 0.009     | 0.069     |
| 100 | 0.08       | 0.05       | -0.239                        | 1.515        | 1.000     | 0.000     | 0.013     | 0.028     | 1.000     | 0.000     | 0.011     | 0.042     |
| 100 | 0.10       | 0.05       | -0.240                        | 1.514        | 1.000     | 0.000     | 0.011     | 0.029     | 1.000     | 0.000     | 0.012     | 0.043     |
| 50  | 0.07       | 0.07       | -0.207                        | 1.543        | 0.119     | 0.002     | 0.004     | 0.025     | 0.113     | 0.003     | 0.004     | 0.044     |
| 50  | 0.08       | 0.05       | -0.239                        | 1.515        | 0.983     | 0.000     | 0.016     | 0.015     | 0.980     | 0.000     | 0.014     | 0.026     |
| 50  | 0.10       | 0.05       | -0.240                        | 1.514        | 0.988     | 0.000     | 0.023     | 0.014     | 0.985     | 0.000     | 0.019     | 0.019     |
| 30  | 0.07       | 0.07       | -0.207                        | 1.543        | 0.074     | 0.003     | 0.006     | 0.012     | 0.065     | 0.006     | 0.005     | 0.021     |
| 30  | 0.08       | 0.05       | -0.239                        | 1.515        | 0.889     | 0.000     | 0.037     | 0.002     | 0.873     | 0.000     | 0.032     | 0.005     |
| 30  | 0.10       | 0.05       | -0.240                        | 1.514        | 0.909     | 0.000     | 0.053     | 0.002     | 0.896     | 0.000     | 0.045     | 0.004     |

True marker distribution in the non-diseased group: Gaussian distribution (mean = -0.3, standard deviation = 0.07)

True marker distribution in the diseased group: mixture of two Gaussian distributions  $(0.5 \times N(0.05, \sigma_1^2) + 0.5 \times N(-0.25, \sigma_2^2))$

\* LCP: Left Coverage Probability – RCP: Right Coverage Probability

N: number of subjects in each group – Gauss: Gaussian distribution – Dirichlet: mixture of Dirichlet processes.
